# Supplementary material
Source: PubMed Central journal article supplement (PMC5022784)
Supplement: ol050081_si_002.pdf [file ol050081_si_002.pdf]

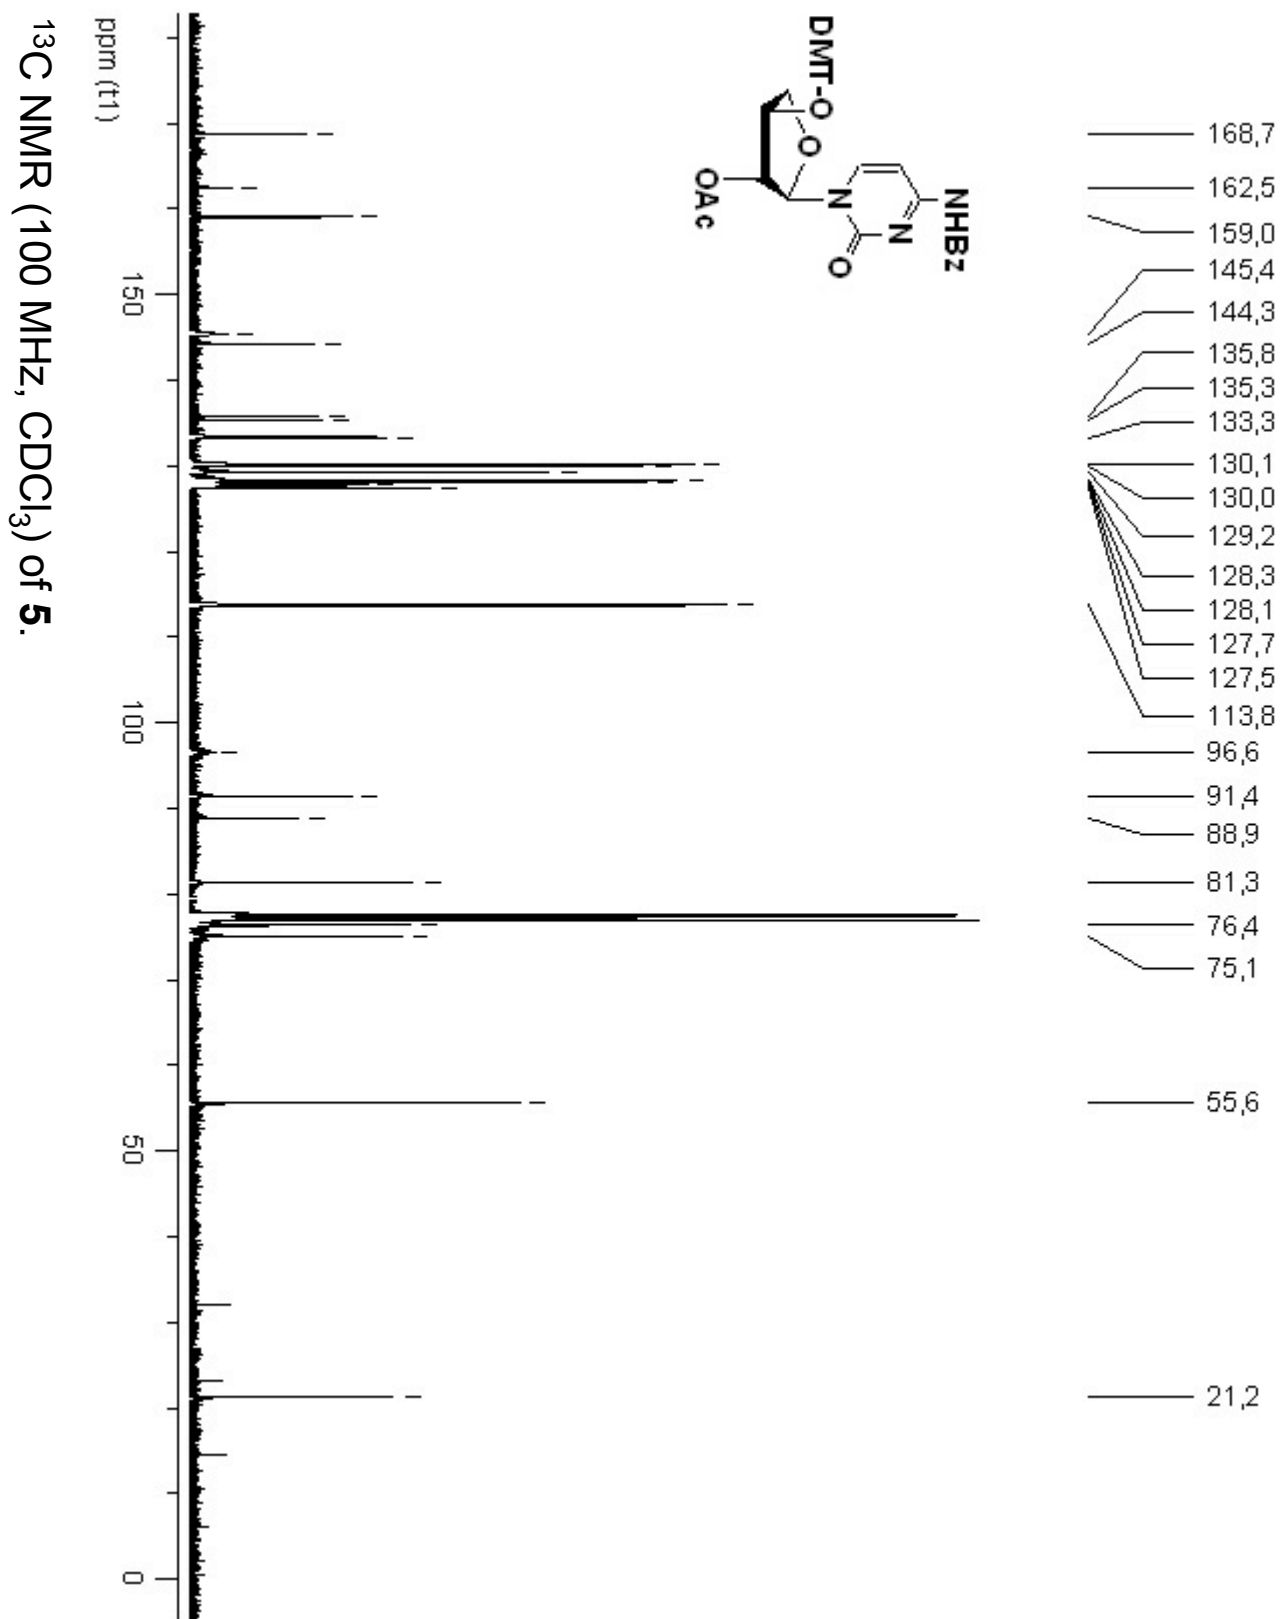

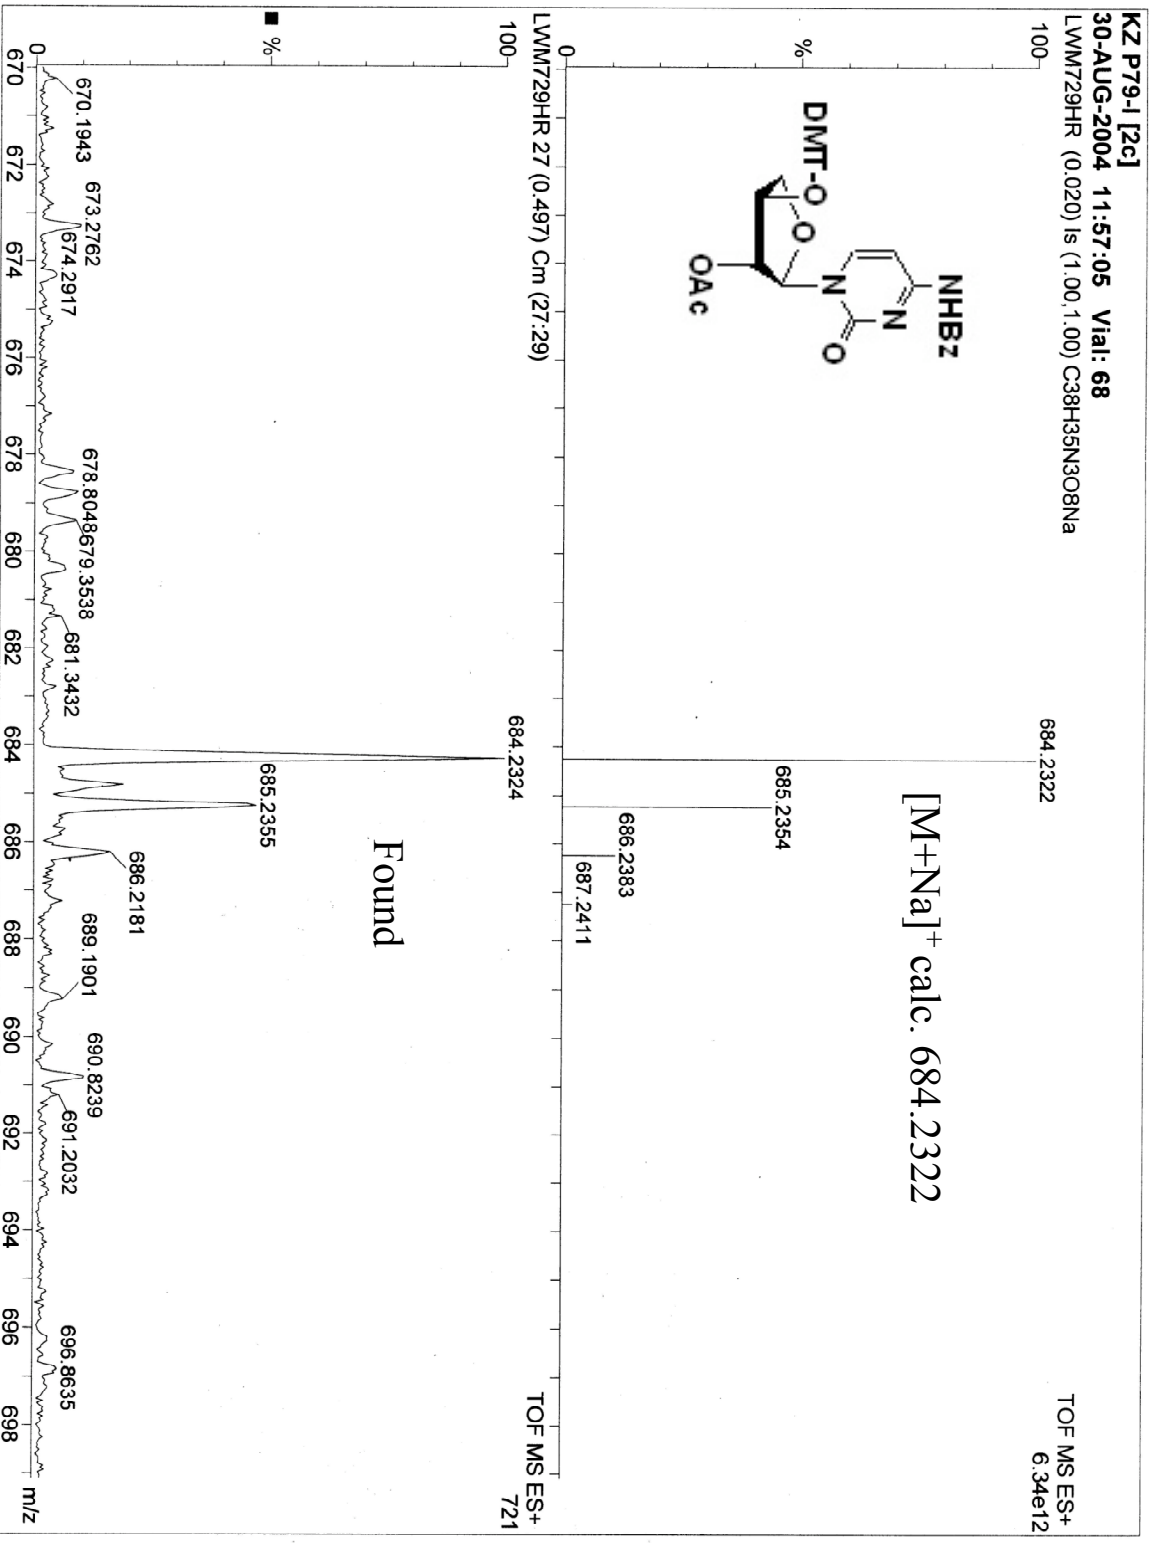

HRMS of 5.



<sup>1</sup>H NMR (100 MHz, DMSO-d<sub>6</sub>) of **6**.

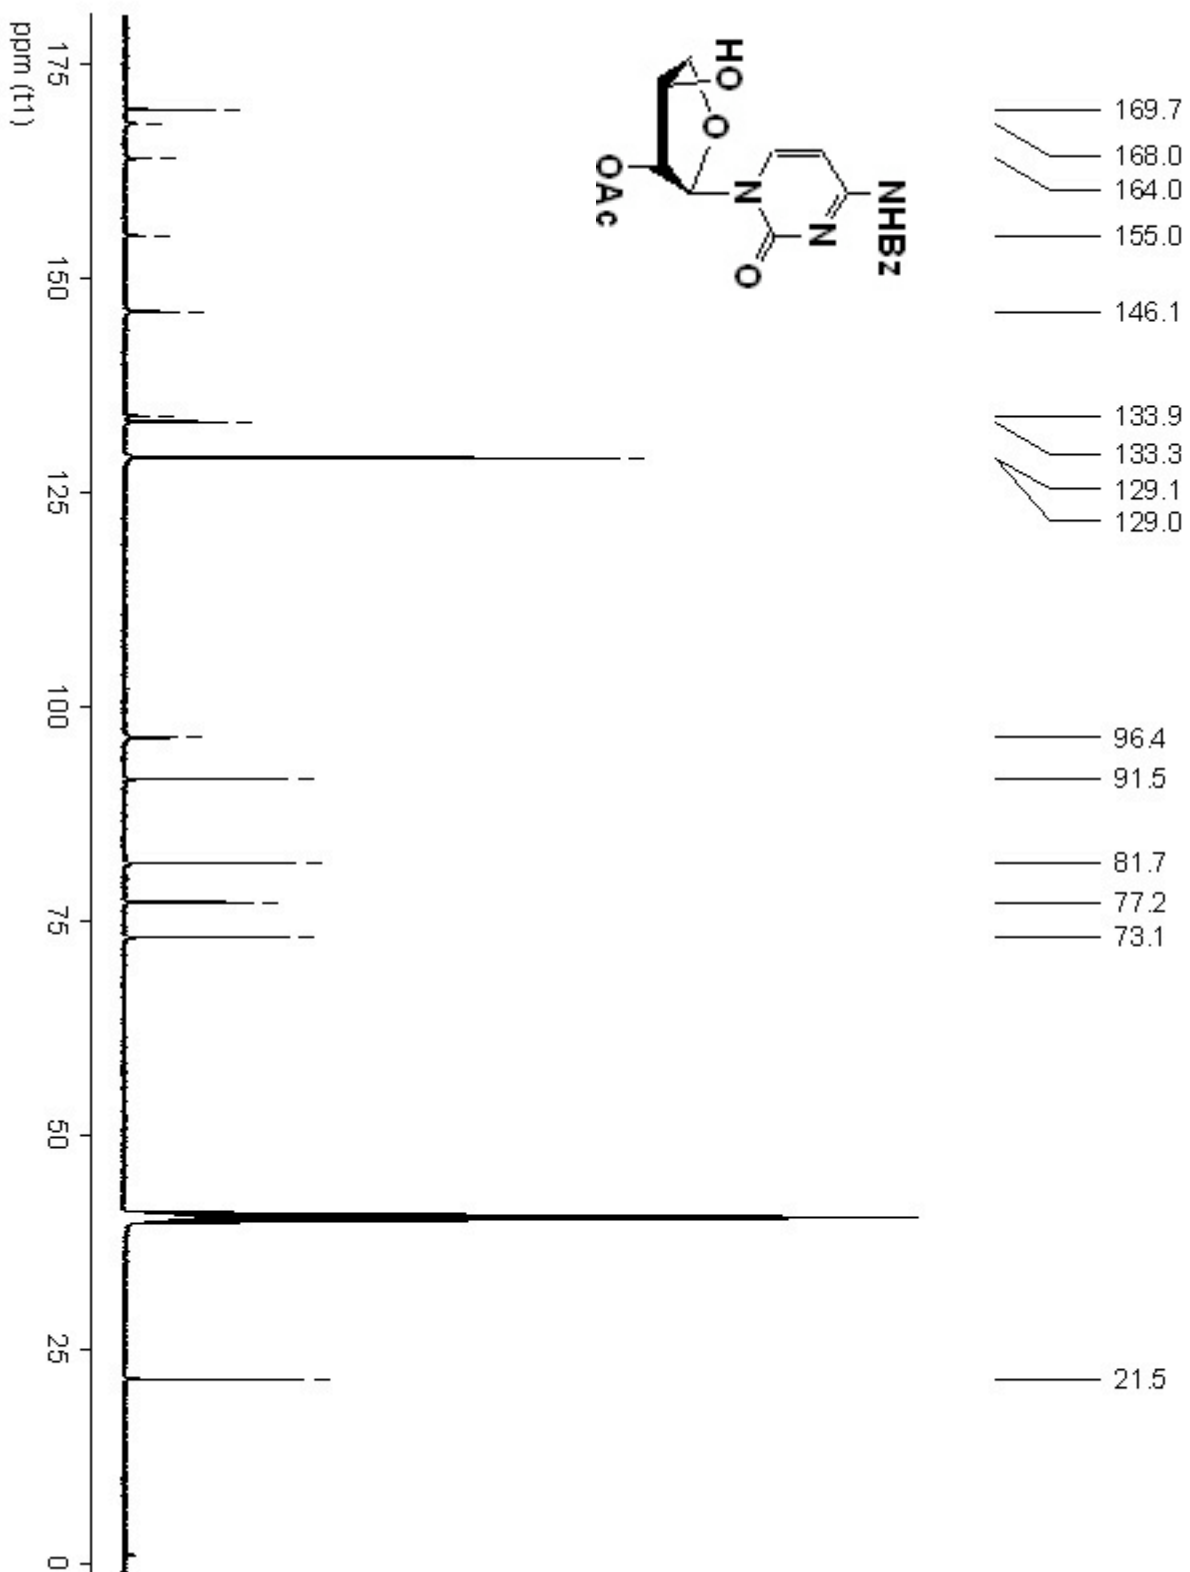

KZ P79-II [2c]

1-SEP-2004 11:17:25 Vial: 3

LWM730HR (0.019) Is (1.00,1.00) C17H17N3O6Na

TOF MS ES+  
8.06e12

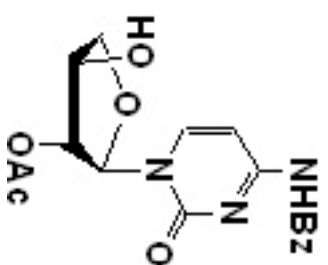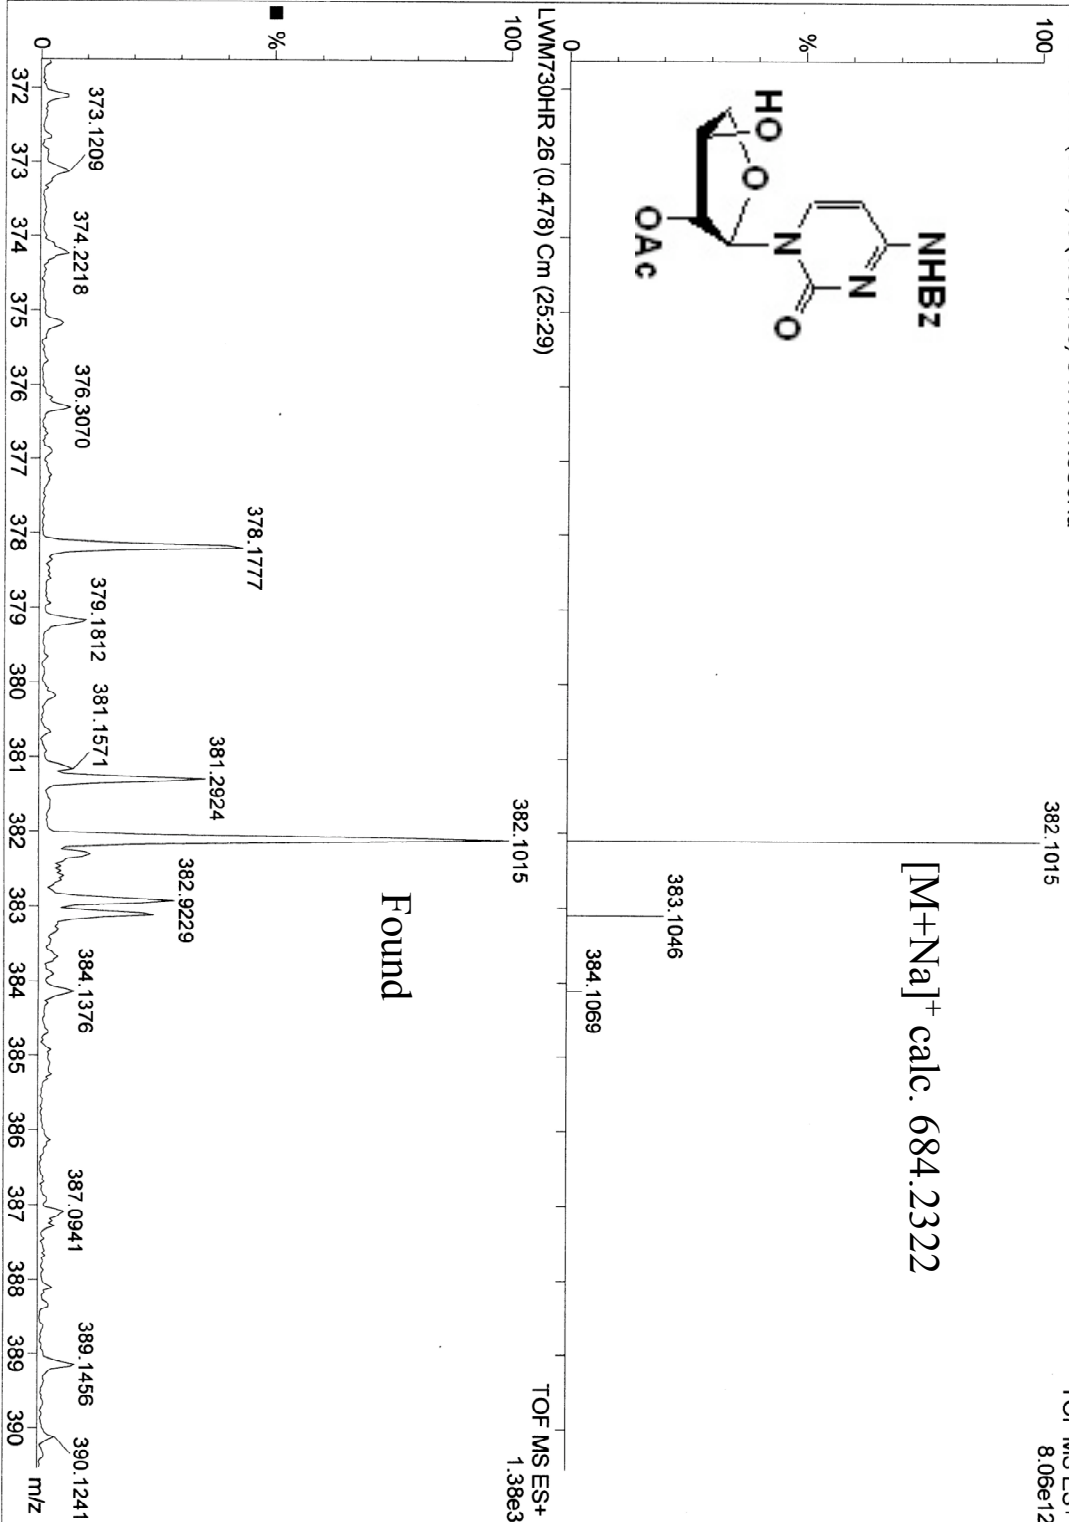

HRMS of 6.

$^{31}\text{P}$  NMR (161.9 MHz, D<sub>2</sub>O) of **8**.

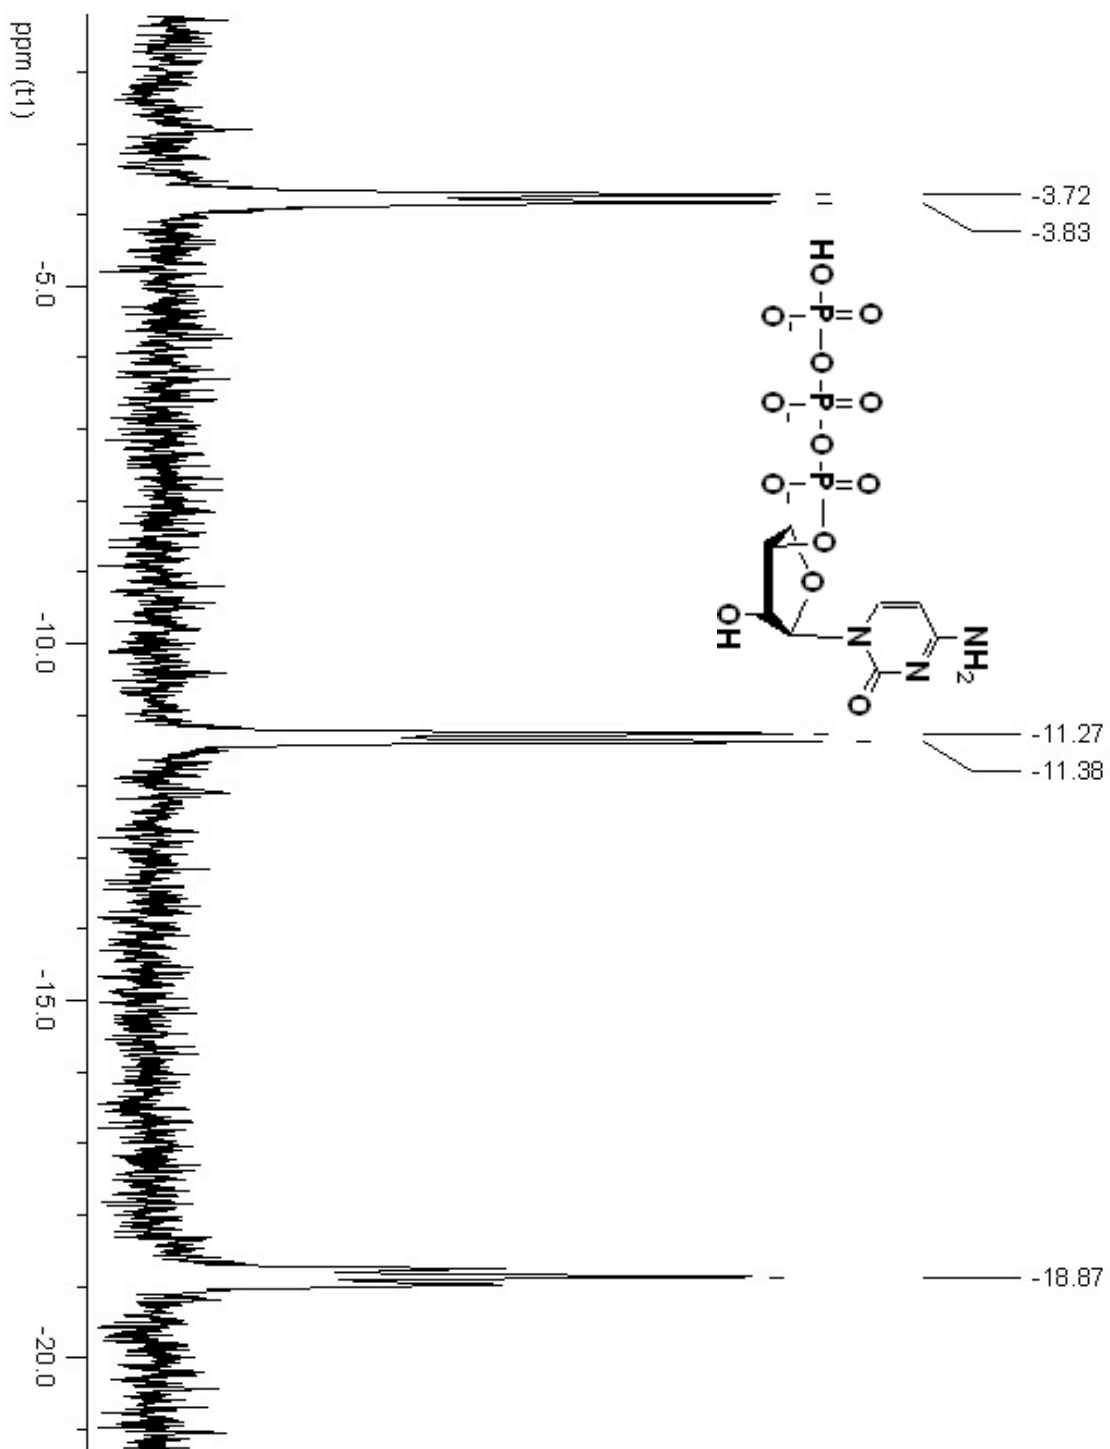

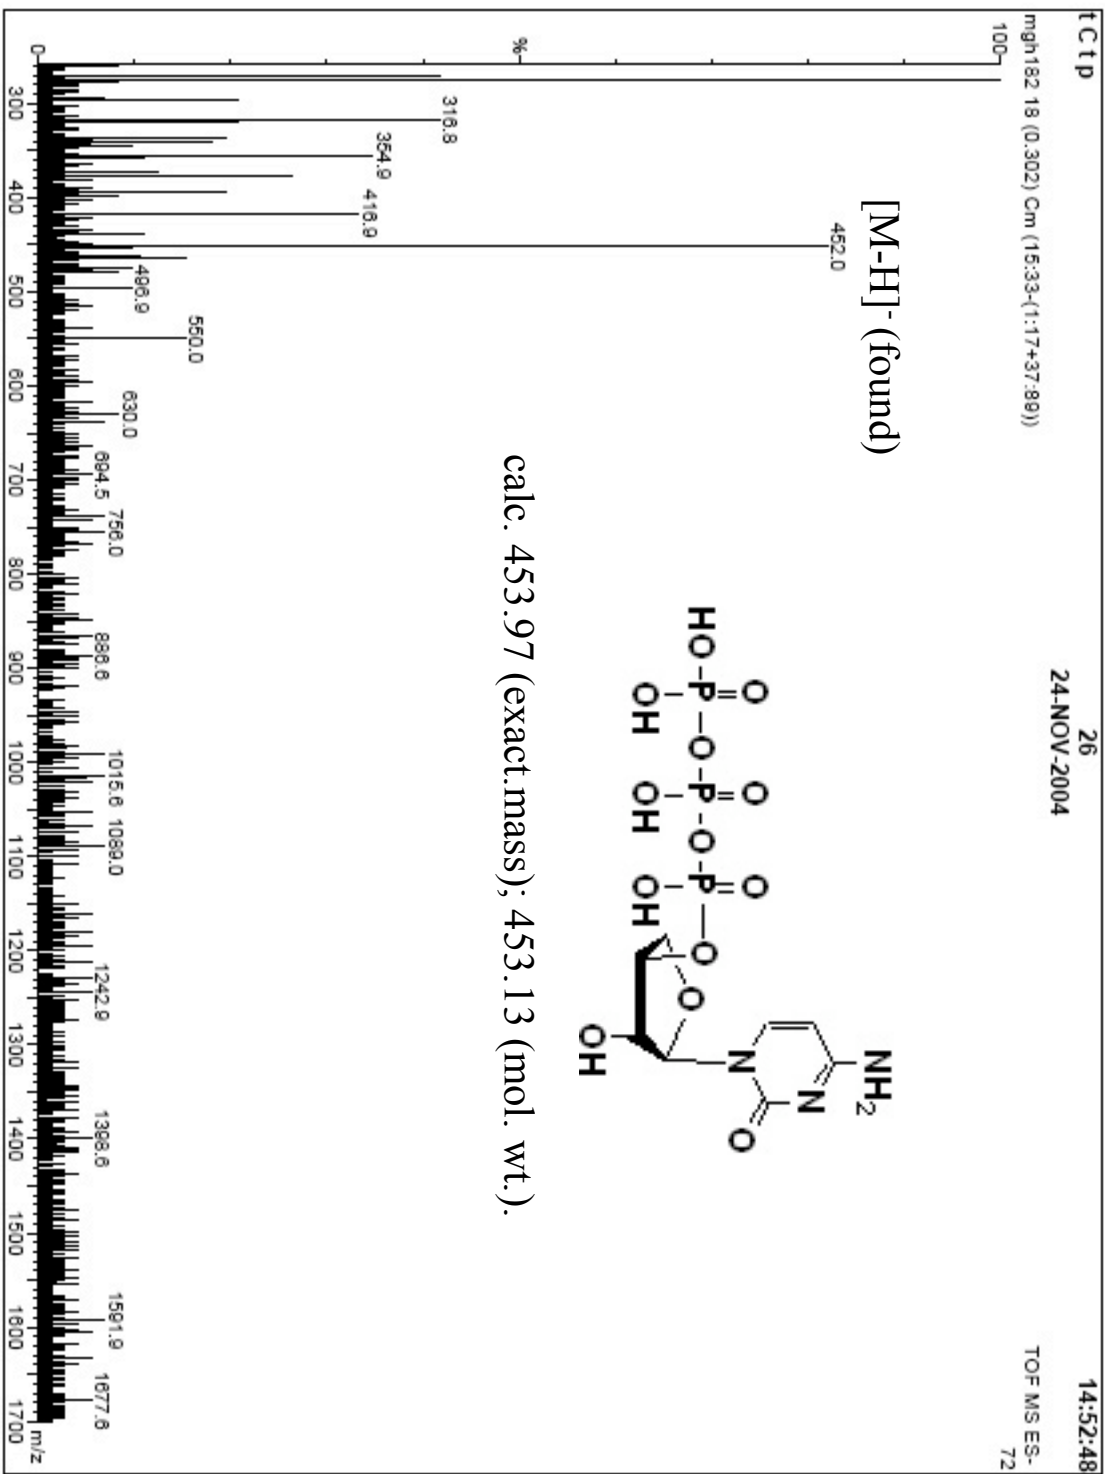

ESI-MS (neg.) of 8.



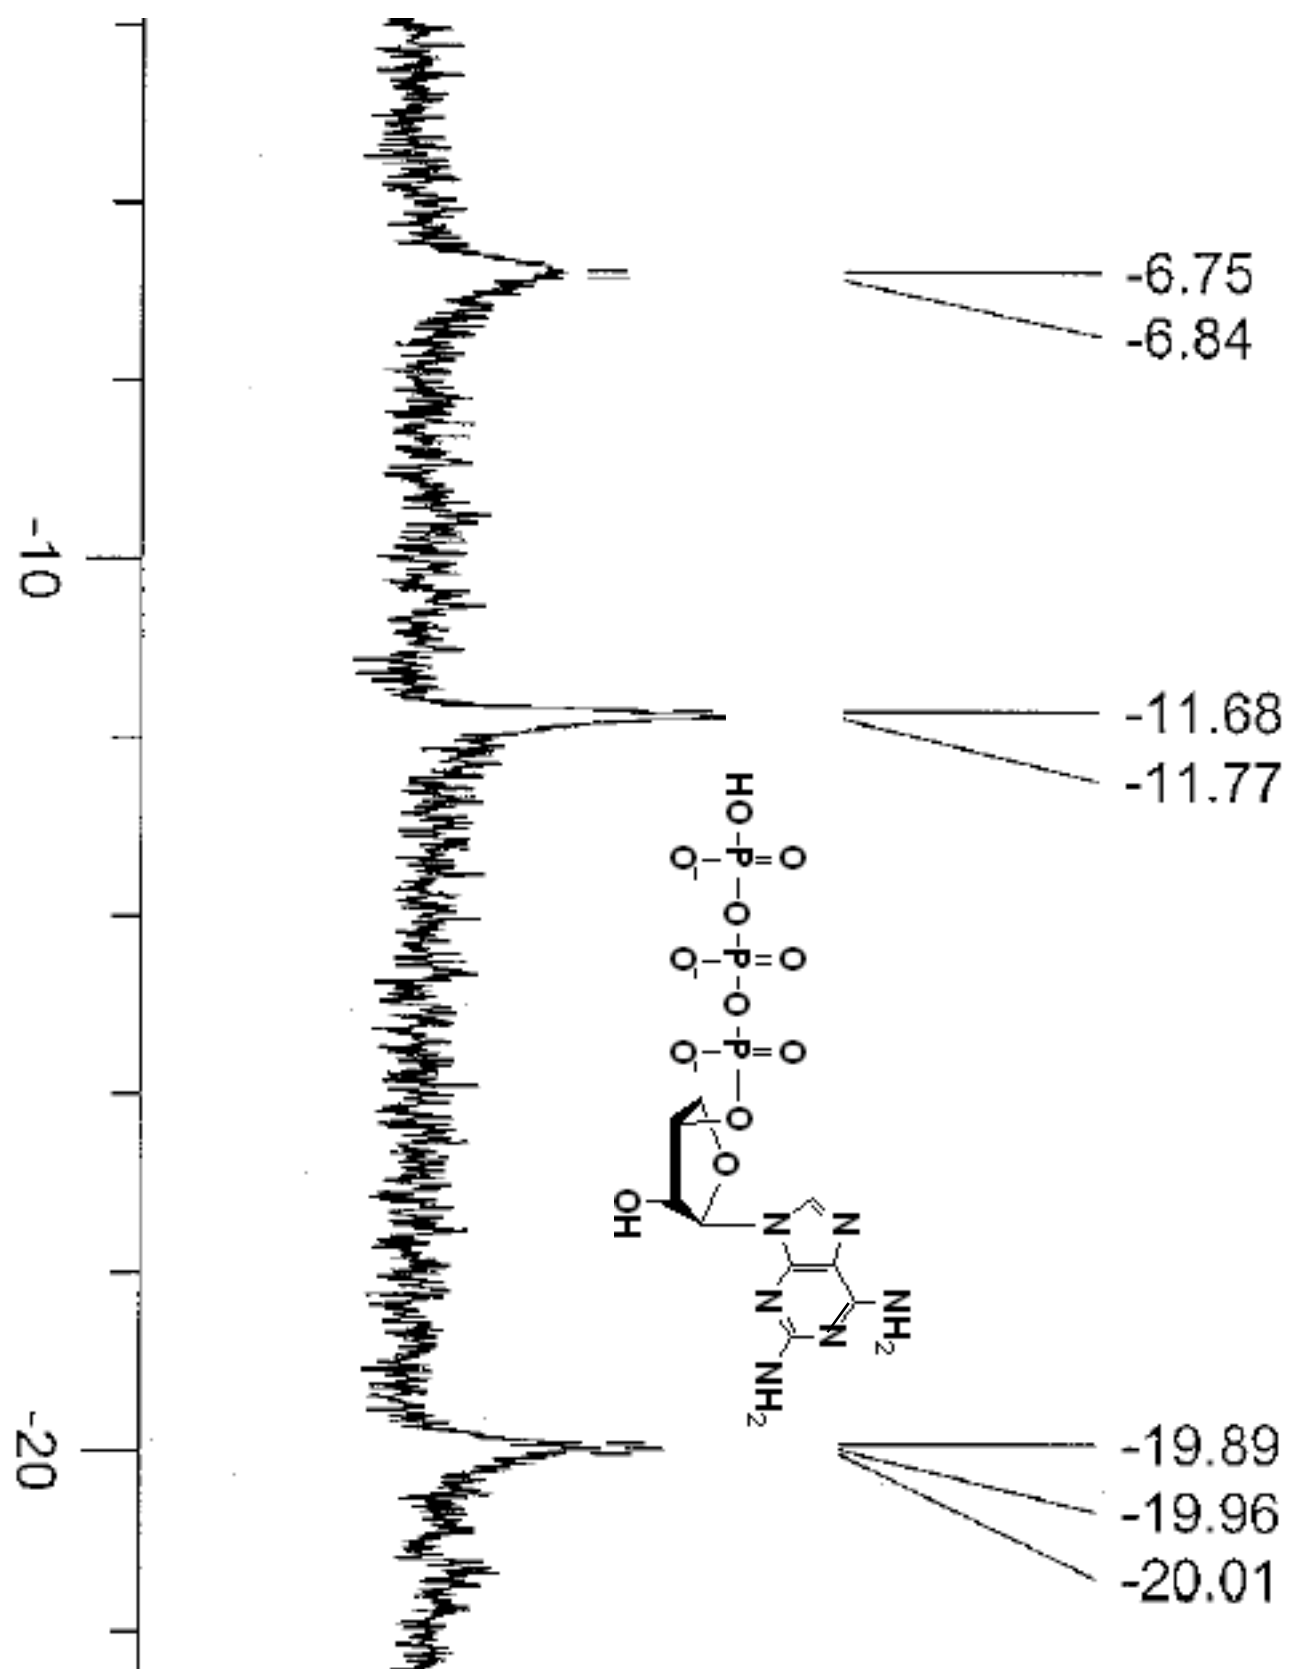

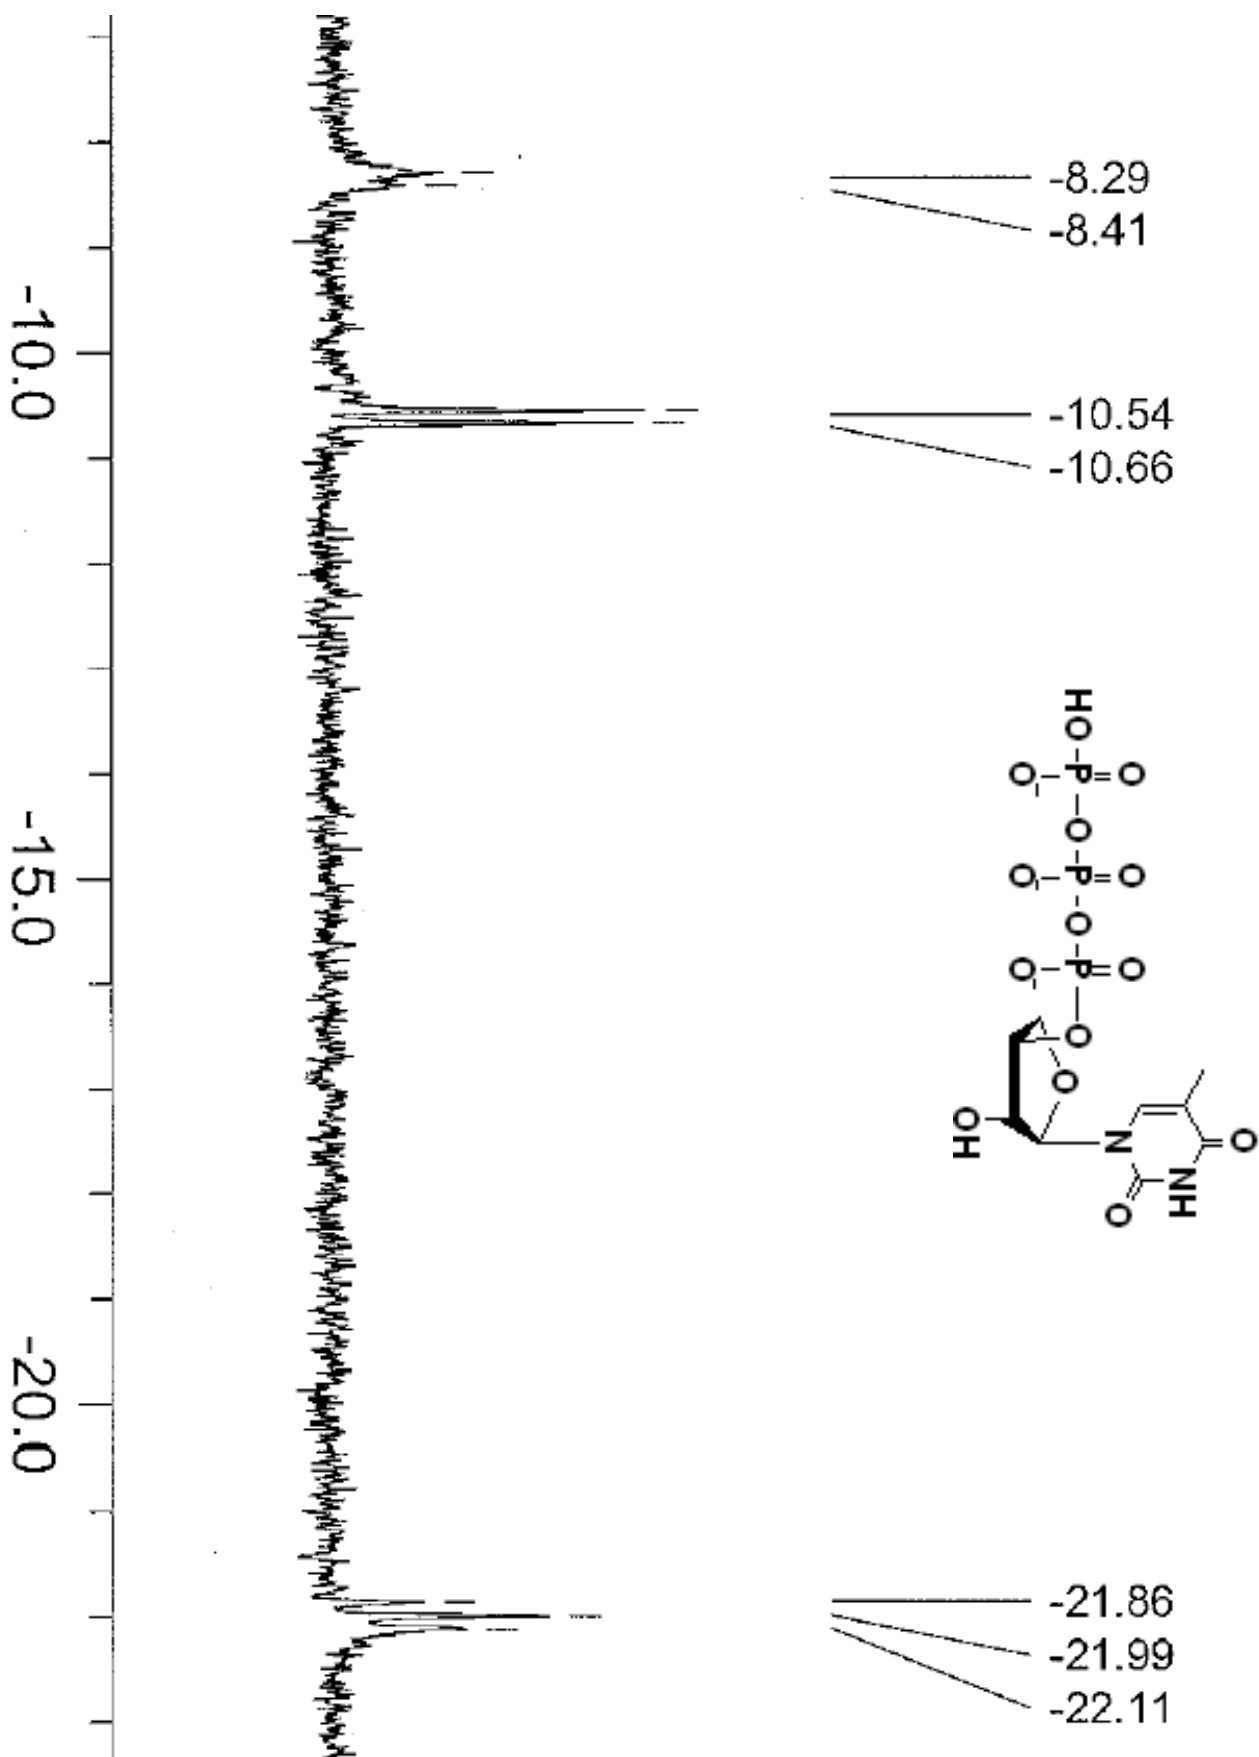

$^{31}\text{P}$  NMR (161.9 MHz,  $\text{D}_2\text{O}$ ) of tGTP

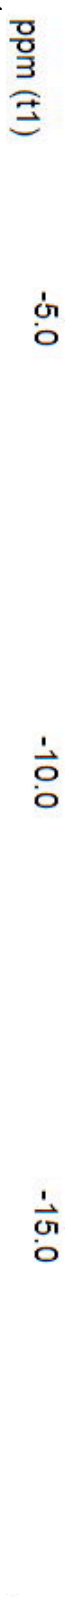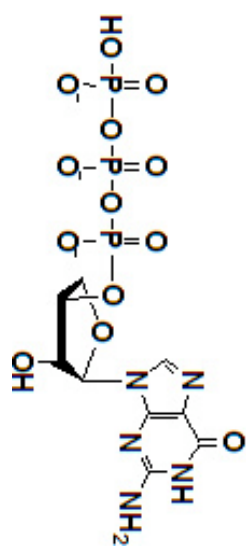

-3,03  
-3,13

-10,34  
-10,45

-17,97  
-18,07  
-18,18
